# Supplementary material for: Association Study Between Coronary Artery Disease and rs1333049 Polymorphism at 9p21.3 Locus in Italian Population
Source: Springer Nature journal article supplement (doi:10.1007/s12265-017-9758-9), 2017-06-21
Supplement: MOESM3 [file 12461470]

***Supplementary Table 3.*** Multivariatemodel considering age at onset and prognostic markers.

| ***Model*** | ***p-value*** | ***OR [95% CI]*** |
| --- | --- | --- |
|
| rs1333049 G allele (Yes *vs* No) | **0.003** | 0.507 [0.324-0.793] |
| Normal arterial blood pressure (Yes *vs* No) (<130 mmHg vs >130 mmHg) | **0.0001** | 0.410 [0.261-0.644] |
| Smoke (Yes *vs* No) | **0.021** | 1.754 [1.089-2.826] |
| Sex (M *vs* F) | 0.066 | 1.890 [0.959-3.724] |
| Familiarity (Yes *vs* No) | 0.114 | 1.475 [0.910-2.391] |
| Normal blood sugar levels (Yes *vs* No) (<110 mg/dl vs >110 mg/dl) | 0.060 | 0.544 [0.288-1.026] |

OR, Odds ratio; CI, confidence interval; Statistically significant P-value are highlighted in bold
